# Supplementary material
Source: PubMed Central journal article supplement (PMC3612664)
Supplement: 1221724110_pnas.201221724SI.pdf [file 1221724110_pnas.201221724SI.pdf]

# Supporting Information

Defenouillère et al. 10.1073/pnas.1221724110

## SI Materials and Methods

**Plasmid Constructions.** Plasmid-borne TAP-Stop and TAP-Non-Stop reporter constructs (TAP; tandem affinity purification) were obtained by PCR-based yeast recombination, respectively, from Stop ProtA (pAV183) and Non-Stop ProtA (pAV184) plasmids (Tables S1 and S2). For this purpose, pAV183 or pAV184 was linearized with XbaI and BamHI and transformed in yeast together with the PCR-amplified TAP-tag. The latter, an N-terminal fusion, was PCR amplified from pBS1761 plasmid (1) with JM028 (5'-GGAGAAAAAACCCCGGATCATAATCGGCCGCTCTAGAATGGCAGGCCTTGCACAACACG-3') and JM029 (5'-GATAAGAAAGCAACACCTGGCAATTCTTACCGGATCTTAGGGCGAATTGGGTACCG-GG-3') oligos.

**Genetic Interaction Mapping Screens.** Genetic interaction mapping (GIM) was done as previously described (2) with two exceptions: The barcoded 979 DAmP strains were added to the pool of mutants and a new system for the cultures of the final pools of haploid double mutants was used. Constant turbidity cultures were done at 30 °C by using a custom-made turbidostat system. This system uses sterile air injection in 10-mL reaction flasks to ensure mixing of the cells and allows yeast growth at rates that are similar to the ones measured in batch cultures. The reference population either came from a parallel screen done with the deletion of *YEL068C* open reading frame or consisted of a mix of at least 10 double-mutant populations obtained with different query gene deletions. Data analysis of the microarray results was done using R to perform Lowess normalization with marray (3) independently for the UP and DOWN measured sets of ratios (corresponding to the two barcodes situated in the 5' and 3' regions of KANMX, Kanamycin resistance cassette). We corrected the results for systematic bias and batch effects by applying a weight on each ratio value. The weights were determined using the whole-screens collection containing at this moment 838 experiments. We supposed that the collection was big enough and the screens sufficiently independent for globally showing no effect on any gene (or spot). Assuming that, we calculated the mean ratio for each spot, expecting a zero value for it. A nonzero value indicates a systematic bias on the spot. We used each nonzero mean spot value to calculate a correction factor, or weight, that would decrease the effect of unwanted biases. We defined empirically the weight applied to a given spot value through the following formula:

$$x_j = \frac{1}{n} \sum_{i=0}^n \text{ratio}_{ij}$$
$$\mu = \frac{1}{n * m} \sum_{j=0}^m \sum_{i=0}^n \text{ratio}_{ij}$$
$$\sigma = \frac{1}{n * m} \sum_{j=0}^m \sum_{i=0}^n (\text{ratio}_{ij} - \mu)^2$$

Weight determination is for the  $j$ th spot,  $\text{log-ratio}_{ij}$  is the log-ratio value of the  $j$ th spot of the  $i$ th experiment,  $n$  is the total number of experiments, and  $m$  is the total number of spots on a microarray.

We obtained weights for the spots, which are near 1 for a mean spot log-ratio value near 0 and a weight near 0 for a mean spot log-

ratio value showing an important bias. Advantages of this method are a progressive way for calculating weights and no need for the use of a threshold for choosing which spot needs to be corrected. We used the same method to determine a weight for batch correction but using  $x_j$  as the mean of the  $j$  spot ratios of the series and  $\mu$  and  $\sigma$  as the mean and SD of the ratios for the same  $j$  spot in all of the experiments of the screen collection:

$$x_j = \frac{1}{p} \sum_{k=0}^p \text{log-ratio}_{kj}$$
$$\mu_j = \frac{1}{m} \sum_{i=0}^m \text{log-ratio}_{ij}$$
$$\sigma_j = \frac{1}{m} \sum_{i=0}^m (\text{log-ratio}_{ij} - \mu_j)^2$$

Weight determination is for the  $j$ th spot,  $\text{log-ratio}_{kj}$  is the log-ratio value of the  $j$ th spot of the  $k$ th experiment,  $p$  is the total number of experiments in the batch, and  $m$  is the total number of spots on a microarray.

For each mutant strain, the median of the batch and globally corrected up and down values were calculated (Dataset S1).

**Tandem Affinity Purifications.** Cells expressing C-terminal TAP fusions (4) of each bait protein were cultivated in 2 L of rich medium (YPD) until  $\text{OD}_{600} = 1$ , and cultures were centrifuged at 4 °C, rinsed in cold water, and frozen at -80 °C. Cell pellets were thawed on ice, resuspended in 20 mL of lysis buffer (20 mM HepesK, pH 7.4, 100 mM KOAc, 10 mM MgCl<sub>2</sub>; Sigma-Aldrich protease inhibitors), and broken with a French press (twice at 1,200 psi), and lysates were clarified by centrifugation at 15,000 ×  $g$  for 20 min at 4 °C. Supernatants were collected with addition of 0.5% Triton X100, 1/2,500 antifoam, and 50 μL of magnetic beads coupled with IgG, and binding was performed on a wheel for 40 min at 4 °C (5). Beads were collected on a magnet to discard lysis buffer and were washed three times in washing buffer containing 0.5% Triton X100 and three times in washing buffer without Triton X100 (20 mM HepesK, pH 7.4, 100 mM KOAc, 10 mM MgCl<sub>2</sub>, 1 mM DTT). Elution was performed in 400 μL of washing buffer (without Triton X100) with 10 μL of AcTEV Protease (Life Technologies) for 1 h 45 min at 17 °C. Eluted beads were discarded on a magnet and eluate proteins were precipitated by the methanol/chloroform technique (6). One-fifth of the precipitated proteins were resuspended in 10 μL sample buffer [100 mM Tris-HCl, pH 6.8, 20% (vol/vol) glycerol, 0.02% bromophenol blue, 8% (wt/vol) SDS, 100 mM DTT], migrated on acrylamide NuPAGE Novex 4–12% Bis-Tris gels (Life Technologies), and analyzed by silver staining using ethanol (7). The rest of the eluates were analyzed by mass spectrometry.

**Mass Spectrometry Experiment and Data Analysis.** Briefly, protein samples were treated with Endoprotease Lys-C and Trypsin (Trypsin Gold Mass Spec Grade; Promega). Peptide samples were desalted by OMIX C18 pipette tips (Agilent Technologies) and then analyzed on an LTQ-Orbitrap velos instrument (Thermo Fisher Scientific) connected online to an Ultimate 3000 nanoHPLC system (Dionex; Thermo Fisher Scientific). Raw mass spectrometry (MS) data from the LTQ-Orbitrap were analyzed using MaxQuant software (8, 9) version 1.3.0.5, which uses the

Andromeda search engine (10). Only protein identifications based on a minimum of two peptides were selected for further quantitative studies. Bioinformatic analysis of the MaxQuant/Andromeda workflow output and the analysis of the abundances of the identified proteins were performed with the Perseus module (version 1.30.4, available as part of the MaxQuant suite). After data processing, label-free quantification (LFQ) values from the “proteinGroups.txt” output file of MaxQuant were further analyzed. To distinguish specifically interacting proteins from the background, protein abundances were compared between sample and control groups, using the Student’s *t* test statistic, and the results were represented as volcano plots (11).

**Northern Blots.** Total RNAs were extracted using the hot phenol procedure from six OD<sub>600</sub> exponential cultures. Two micrograms

of total RNA was separated on a 1% agarose gel, transferred on a Hybond N<sup>+</sup> membrane, and probed with <sup>32</sup>P-radiolabeled oligonucleotides that are specific to ProtA mRNA (YY233 5'-TCTACTTTTCGGCGCCTGAGCATCATTT-3') or Scr1 RNA (YY234 5'-GTCTAGCCGCGAGGAAGG-3').

**mRNA Degradation Assays.** Yeast strains transformed with the ProtA-Non-Stop reporter gene (pAV184) were grown in the presence of 2% galactose at 30 °C. To switch off the expression of the reporter gene that is under the control of a *GAL1* promoter, cells were switched to glucose media at *T* = 0 min. Aliquots were withdrawn from the cell culture, for each indicated time point. Total RNAs were extracted and analyzed by Northern blot as described above.

- Puig O, et al. (2001) The tandem affinity purification (TAP) method: A general procedure of protein complex purification. *Methods* 24(3):218–229.
- Decourty L, et al. (2008) Linking functionally related genes by sensitive and quantitative characterization of genetic interaction profiles. *Proc Natl Acad Sci USA* 105(15):5821–5826.
- Yang YH, Paquet A, Dudoit S (2009) *Exploratory analysis for two-color spotted microarray data*. R package version 1.34.0. Available at <http://www.maths.usyd.edu.au/u/jeany/>.
- Rigaut G, et al. (1999) A generic protein purification method for protein complex characterization and proteome exploration. *Nat Biotechnol* 17(10):1030–1032.
- Oeffinger M, et al. (2007) Comprehensive analysis of diverse ribonucleoprotein complexes. *Nat Methods* 4(11):951–956.
- Wessel D, Flügge UI (1984) A method for the quantitative recovery of protein in dilute solution in the presence of detergents and lipids. *Anal Biochem* 138(1):141–143.
- Yan JX, et al. (2000) A modified silver staining protocol for visualization of proteins compatible with matrix-assisted laser desorption/ionization and electrospray ionization-mass spectrometry. *Electrophoresis* 21(17):3666–3672.
- Cox J, Mann M (2008) MaxQuant enables high peptide identification rates, individualized p.p.b.-range mass accuracies and proteome-wide protein quantification. *Nat Biotechnol* 26(12):1367–1372.
- Cox J, et al. (2009) A practical guide to the MaxQuant computational platform for SILAC-based quantitative proteomics. *Nat Protoc* 4(5):698–705.
- Cox J, et al. (2011) Andromeda: A peptide search engine integrated into the MaxQuant environment. *J Proteome Res* 10(4):1794–1805.
- Hubner NC, Mann M (2011) Extracting gene function from protein-protein interactions using Quantitative BAC Interactomics (QUBIC). *Methods* 53(4):453–459.

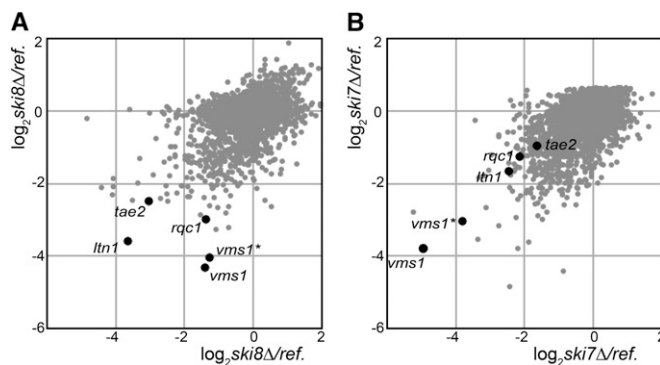

**Fig. 51.** *SKI7* and *SKI8* are functionally linked to translation-associated element 2 (*TAE2*), ribosomal quality control 1 (*RQC1*), and *LTN1*. (A) Comparison of two independent GIM screens, using *ski8Δ* as a query gene. The experiment and analysis were done as described in Fig. 1 in the main text. (B) Comparison of two independent GIM screens, using *ski7Δ* as query gene. The experiment and analysis were done as described in Fig. 1 in the main text.

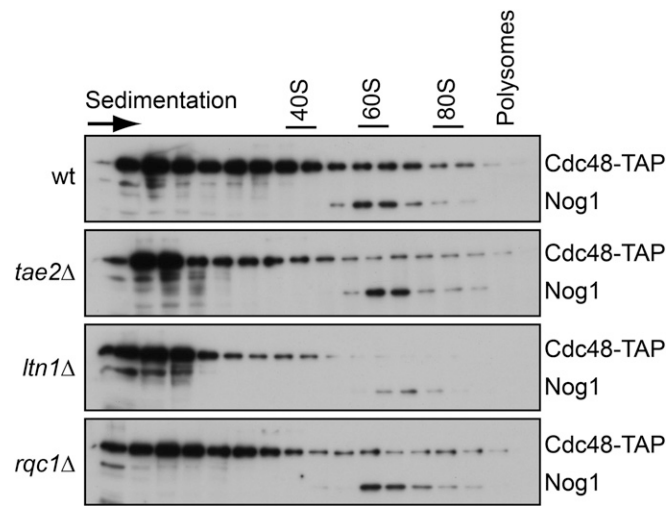

**Fig. S2.** Sedimentation of the AAA-ATPase Cdc48-TAP fusion protein in the absence of Ltn1, Tae2, or Rqc1 protein. Total cellular extracts from cells expressing Cdc48-TAP in WT or in the absence of Ltn1, Tae2, and Rqc1 were separated on a 10–30% sucrose gradient as described in Fig. 2 in the main text.

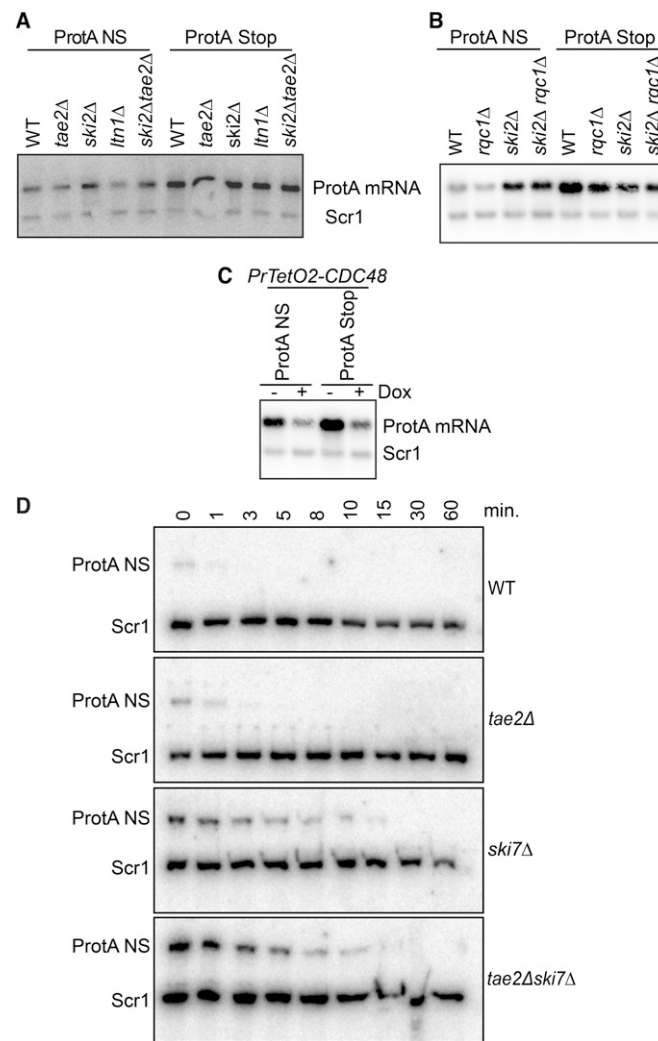

**Fig. S3.** The level of ProtA-Non-Stop mRNA is not affected in the absence of Tae2, Ltn1, or Rqc1 as well as upon depletion of Cdc48. (A–D) Northern blot analysis of total mRNAs using probes against ProtA mRNA or Scr1 RNA as indicated in *SI Materials and Methods*. Plasmid-borne reporter constructs expressing ProtA-NS (pAV184) or ProtA-Stop (pAV183) are described in Tables S1 and S2. (A) ProtA-Non-Stop mRNA does not accumulate in the *tae2* $\Delta$  mutant. ProtA-NS (Non-Stop) and ProtA-Stop mRNA levels in WT, *tae2* $\Delta$ , *ski2* $\Delta$ , *ltn1* $\Delta$ , and *ski2* $\Delta$ *tae2* $\Delta$  cells were analyzed by Northern blot. (B) *rqc1* $\Delta$  does not accumulate Non-Stop ProtA mRNA. ProtA-NS and ProtA-Stop mRNAs were analyzed as described in A. (C) Depletion of Cdc48 does not accumulate ProtA-NS mRNA. The *PrTetO2-CDC48* strain, where *CDC48* is under the control of a tetracyclin-repressible promoter, was incubated in the absence or the presence of Doxycycline (5  $\mu$ g/mL) for 13 h. ProtA-NS or ProtA-Stop mRNAs were detected as indicated in A. (D) The half-life of Non-Stop ProtA mRNA is not affected by the absence of Tae2. Shown is Northern blot analysis of ProtA-NS mRNA amounts during an expression shutoff time course, in WT, *tae2* $\Delta$ , *ski7* $\Delta$ , or *ski7* $\Delta$ *tae2* $\Delta$  cells.

**Table S1. Yeast strains used in this study**

| Strains                  | Genotypes                                                                                                                                                              | Source     |
|--------------------------|------------------------------------------------------------------------------------------------------------------------------------------------------------------------|------------|
| <b>Wild type</b>         |                                                                                                                                                                        |            |
| BY4741                   | <i>MAT<math>\alpha</math></i> , <i>ura3<math>\Delta</math>0</i> , <i>his3<math>\Delta</math>1</i> , <i>leu2<math>\Delta</math>0</i> , <i>met15<math>\Delta</math>0</i> | (1)        |
| BY4742                   | <i>MAT<math>\alpha</math></i> , <i>ura3<math>\Delta</math>0</i> , <i>his3<math>\Delta</math>1</i> , <i>leu2<math>\Delta</math>0</i> , <i>lys2<math>\Delta</math>0</i>  | (1)        |
| <b>Fusion proteins</b>   |                                                                                                                                                                        |            |
| LMA1949                  | As BY4741, <b>Tae2-TAP</b> : <i>HIS3MX6</i>                                                                                                                            | (2)        |
| LMA1951                  | As BY4741, <b>Rqc1-TAP</b> : <i>HIS3MX6</i>                                                                                                                            | (2)        |
| LMA2195                  | As BY4741, <b>Rpl16a-TAP</b> : <i>HIS3MX6</i>                                                                                                                          | (2)        |
| LMA2196                  | As BY4741, <b>Cdc48-TAP</b> : <i>HIS3MX6</i> ,                                                                                                                         | (2)        |
| LMA2544                  | As BY4741, <b>Ltn1-TAP</b> : <i>HIS3MX6</i>                                                                                                                            | (2)        |
| LMA2685                  | As BY4741, <b>Tae2-TAP</b> : <i>HIS3MX6</i> , <b>ltn1<math>\Delta</math></b> :: <i>KANMX4</i>                                                                          | This study |
| LMA2686                  | As BY4741, <b>Tae2-TAP</b> : <i>HIS3MX6</i> , <b>rqc1<math>\Delta</math></b> :: <i>KANMX4</i>                                                                          | This study |
| LMA2688                  | As BY4741, <b>Rqc1-TAP</b> : <i>HIS3MX6</i> , <b>tae2<math>\Delta</math></b> :: <i>KANMX4</i>                                                                          | This study |
| LMA2689                  | As BY4741, <b>Rqc1-TAP</b> : <i>HIS3MX6</i> , <b>ltn1<math>\Delta</math></b> :: <i>KANMX4</i>                                                                          | This study |
| LMA2711                  | As BY4741, <b>Cdc48-TAP</b> : <i>HIS3MX6</i> , <b>ltn1<math>\Delta</math></b> :: <i>URA3</i>                                                                           | This study |
| LMA2712                  | As BY4741, <b>Cdc48-TAP</b> : <i>HIS3MX6</i> , <b>tae2<math>\Delta</math></b> :: <i>KANMX4</i>                                                                         | This study |
| LMA2713                  | As BY4741, <b>Cdc48-TAP</b> : <i>HIS3MX6</i> , <b>rqc1<math>\Delta</math></b> :: <i>KANMX4</i>                                                                         | This study |
| <b>Mutants</b>           |                                                                                                                                                                        |            |
| LMA1713                  | As BY4741, <b>tae2<math>\Delta</math></b> :: <i>HIS3</i>                                                                                                               | This study |
| LMA1740                  | As BY4741, <b>ski2<math>\Delta</math></b> :: <i>URA3</i>                                                                                                               | This study |
| LMA1986                  | As BY4741, <b>ltn1<math>\Delta</math></b> :: <i>URA3</i>                                                                                                               | This study |
| LMA1741                  | As BY4741, <b>tae2<math>\Delta</math></b> :: <i>HIS3</i> , <b>ski2<math>\Delta</math></b> :: <i>URA3</i>                                                               | This study |
| LMA2026                  | As BY4741, <b>tae2<math>\Delta</math></b> :: <i>HIS3</i> , <b>ltn1<math>\Delta</math></b> :: <i>URA3</i>                                                               | This study |
| LMA1744                  | As BY4741, <b>tae2<math>\Delta</math></b> :: <i>URA3</i>                                                                                                               | This study |
| LMA2203                  | As BY4741, <b>ltn1<math>\Delta</math></b> :: <i>HIS3</i>                                                                                                               | This study |
| LMA2204                  | As BY4741, <b>ltn1<math>\Delta</math></b> :: <i>HIS3</i> , <b>ski2<math>\Delta</math></b> :: <i>URA3</i>                                                               | This study |
| LMA2714                  | As BY4741, <b>rqc1<math>\Delta</math></b> :: <i>HIS3</i>                                                                                                               | This study |
| LMA2715                  | As BY4741, <b>rqc1<math>\Delta</math></b> :: <i>HIS3</i> , <b>ski2<math>\Delta</math></b> :: <i>URA3</i>                                                               | This study |
| LMA2649                  | As BY4741, <b>PrTetO2 CDC48</b> :: <i>KANMX4</i>                                                                                                                       | This study |
| LMA843                   | As BY4742, <b>yeI068c<math>\Delta</math></b> :: <i>PraNATMX4</i> , <b>ydI242w<math>\Delta</math></b> :: <i>KANMX4</i>                                                  | This study |
| LMA836                   | As BY4742, <b>tae2<math>\Delta</math></b> :: <i>PraNATMX4</i> , <b>yeI068c<math>\Delta</math></b> :: <i>KANMX4</i>                                                     | This study |
| LMA837                   | As BY4742, <b>ski2<math>\Delta</math></b> :: <i>KANMX4</i> , <b>yeI068c<math>\Delta</math></b> :: <i>PraNATMX4</i>                                                     | This study |
| LMA832                   | As BY4742, <b>ski7<math>\Delta</math></b> :: <i>KANMX4</i> , <b>tae2<math>\Delta</math></b> :: <i>PraNATMX4</i>                                                        | This study |
| LMA839                   | As BY4742, <b>ski7<math>\Delta</math></b> :: <i>KANMX4</i> , <b>yeI068c<math>\Delta</math></b> :: <i>PraNATMX4</i>                                                     | This study |
| LMA1921                  | As BY4742, <b>ltn1<math>\Delta</math></b> :: <i>KANMX4</i> , <b>yeI068c<math>\Delta</math></b> :: <i>PraNATMX4</i>                                                     | This study |
| LMA830                   | As BY4742, <b>tae2<math>\Delta</math></b> :: <i>PraNATMX4</i> , <b>ski2<math>\Delta</math></b> :: <i>KANMX4</i>                                                        | This study |
| LMA1920                  | As BY4742, <b>tae2<math>\Delta</math></b> :: <i>PraNATMX4</i> , <b>ltn1<math>\Delta</math></b> :: <i>KANMX4</i>                                                        | This study |
| LMA1997                  | As BY4742, <b>ski2<math>\Delta</math></b> :: <i>PraNATMX4</i> , <b>ltn1<math>\Delta</math></b> :: <i>KANMX4</i>                                                        | This study |
| LMA2001                  | As BY4742, <b>ski7<math>\Delta</math></b> :: <i>PraNATMX4</i> , <b>ltn1<math>\Delta</math></b> :: <i>KANMX4</i>                                                        | This study |
| LMA2306                  | As BY4742, <b>rqc1<math>\Delta</math></b> :: <i>KANMX4</i> , <b>yeI068c<math>\Delta</math></b> :: <i>PraNATMX4</i>                                                     | This study |
| LMA1996                  | As BY4742, <b>rqc1<math>\Delta</math></b> :: <i>KANMX4</i> , <b>ski2<math>\Delta</math></b> :: <i>PraNATMX4</i>                                                        | This study |
| LMA2709                  | As BY4742, <b>KANMX4:PrTetO2:CDC48</b>                                                                                                                                 | This study |
| LMA2719                  | As BY4742, <b>PraNATMX4:PrTetO2:CDC48</b>                                                                                                                              | This study |
| LMA2746                  | As BY4742, <b>PraNATMX4:PrTetO2:CDC48</b> , <b>ski2<math>\Delta</math></b> :: <i>KANMX4</i>                                                                            | This study |
| <b>GIM query strains</b> |                                                                                                                                                                        |            |
| GIM123                   | As BY4741, <b>ski2<math>\Delta</math></b> :: <i>PraNATMX4</i>                                                                                                          | This study |
| GIM155                   | As BY4741, <b>tae2<math>\Delta</math></b> :: <i>PraNATMX4</i>                                                                                                          | This study |
| GIM225                   | As BY4741, <b>ski8<math>\Delta</math></b> :: <i>PraNATMX4</i>                                                                                                          | This study |
| GIM477                   | As BY4741, <b>ski7<math>\Delta</math></b> :: <i>PraNATMX4</i>                                                                                                          | This study |
| GIM479                   | As BY4741, <b>rqc1<math>\Delta</math></b> :: <i>PraNATMX4</i>                                                                                                          | This study |
| GIM503                   | As BY4741, <b>ski3<math>\Delta</math></b> :: <i>PraNATMX4</i>                                                                                                          | This study |
| GIM448                   | As BY4741, <b>ltn1<math>\Delta</math></b> :: <i>PraNATMX4</i>                                                                                                          | This study |

The modified genes of interest are indicated in bold.

1. Brachmann CB, et al. (1998) Designer deletion strains derived from *Saccharomyces cerevisiae* S288C: A useful set of strains and plasmids for PCR-mediated gene disruption and other applications. *Yeast* 14(2):115–132.
2. Ghaemmaghami S, et al. (2003) Global analysis of protein expression in yeast. *Nature* 425(6959):737–741.

**Table S2. Yeast plasmids used in this study**

| Plasmid       | Markers    | Source     |
|---------------|------------|------------|
| pGID1         | URA3, HygR | (1)        |
| pAV183        | URA3       | (2)        |
| pAV184        | URA3       | (2)        |
| pAV188        | URA3       | (2)        |
| pTAP Stop     | URA3       | This study |
| pTAP Non-Stop | URA3       | This study |

1. Decourty L, et al. (2008) Linking functionally related genes by sensitive and quantitative characterization of genetic interaction profiles. *Proc Natl Acad Sci USA* 105(15):5821–5826.
2. van Hoof A, Frischmeyer PA, Dietz HC, Parker R (2002) Exosome-mediated recognition and degradation of mRNAs lacking a termination codon. *Science* 295(5563):2262–2264.

**Table S3. Antibodies used for immunodetection**

| Target              | Antibody                                                                             | Dilution  |
|---------------------|--------------------------------------------------------------------------------------|-----------|
| TAP-tagged proteins | Peroxydase anti-peroxidase complex (PAP) (Sigma-Aldrich)                             | 1/10,000  |
| HA-tagged proteins  | Anti-HA peroxidase (Roche)                                                           | 1/500     |
| Cdc48               | Rabbit polyclonal, gift of Alexander Buchberger<br>(University of Würzburg, Germany) | 1/4,000   |
| Nog1                | Rabbit polyclonal                                                                    | 1/5,000   |
| Rps8                | Rabbit polyclonal, gift of Georgio Dieci<br>(Università degli Studi di Parma, Italy) | 1/5,000   |
| G6PDH               | Rabbit polyclonal                                                                    | 1/100,000 |
| Ubiquitin           | P4D1, monoclonal (Covance)                                                           | 1/1,000   |

Nog1 is a pre60S factor which marks the 60S fractions. Rps8 is a ribosomal protein of the small subunit which marks 40S, 80S and polysomal fractions. G6PDH (Glucose-6-Phosphate-Deshydrogenase) is used as loading control.

## Other Supporting Information Files

[Dataset S1 \(XLSX\)](#)

[Dataset S2 \(XLSX\)](#)

[Dataset S3 \(XLSX\)](#)

[Dataset S4 \(XLSX\)](#)
